# Supplementary material
Source: HighWire-hosted journal article supplement (doi:10.1101/rna.055277.115)
Supplement: Supplemental_Tables.docx [file Supplemental_Tables.docx]

Table S1: Comparison of enthalpy of duplex formation for duplexes containing 7DA⋅U pairs with predicted enthalpy for corresponding A-U duplexes

Table S2: Comparison of entropy of duplex formation for duplexes containing 7DA⋅U pairs with predicted entropy for corresponding A-U duplexes

Table S3: 7DA⋅U Contribution to Thermodynamics*a*
